# Supplementary material
Source: PubMed Central journal article supplement (PMC7271350)

## **Supporting Information**

### **Research on Treatment of Oily Sludge from Tank Bottom by Ball Milling Combined with Ozone Catalyzed Oxidation**

**Hong-Shuo Chen, Qi-Ming Zhang, Zi-Jian Yang, Yang-Sheng Liu\***

**†College of Environmental Sciences and Engineering, Peking University, Beijing 100871,  
People's Republic of China.**

**E-mail: yshliu2018@163.com**

## Content

**Table S1.** Heavy metal content in oily sludge

**Table S2.** Particle size distribution of solid from oily sludge

**Table S3.** Properties of NAO and CAO catalysts

**Table S4.** Reaction parameters of ozone oxidation and ozone catalytic oxidation processes

**Table S5.** Analysis and comparison of CO, BO and BOO from oily soil

**Figure S1.** Catalyst preparation process

**Figure S2.** Micromorphology of the oily sludge (a) 50× ; (b)200×

**Figure S3.** Thermal gravimetric analysis of CO, BO and BOO from oily sludge

**Table S1.** Heavy metal content in oily sludge

| Heavy metal category | Measured value/mg•kg <sup>-1</sup> | Standard value/mg•kg <sup>-1</sup> |
|----------------------|------------------------------------|------------------------------------|
| Cd                   | <10                                | <15                                |
| Hg                   | 0                                  | <15                                |
| Pb                   | <150                               | <1 000                             |
| Cr                   | 205                                | <1 000                             |
| As                   | <50                                | <75                                |
| Cu                   | 115                                | <1 500                             |
| Zn                   | 200                                | <3 000                             |
| Ni                   | 65                                 | <200                               |

**Table S2.** Particle size distribution of solid from oily sludge

| Particle size/μm | Content/wt% |
|------------------|-------------|
| >600             | 21.47       |
| 325-600          | 14.94       |
| 120-325          | 10.01       |
| 45-120           | 16.56       |
| 38-45            | 9.82        |
| <38              | 27.20       |

**Table S3.** Properties of NAO and CAO catalysts

| Item | Surface area/<br>(m <sup>2</sup> •g <sup>-1</sup> ) | Pore volume/<br>(cm <sup>3</sup> •g <sup>-1</sup> ) | Pore diameter/<br>nm | pH <sub>pzc</sub> |
|------|-----------------------------------------------------|-----------------------------------------------------|----------------------|-------------------|
| CAO  | 1.143                                               | 0.004                                               | 13.97                | 11.48             |
| NAO  | 0.873                                               | 0.002                                               | 9.46                 | 7.20              |

**Table S4.** Reaction parameters of ozone oxidation and ozone catalytic oxidation processes

| Item         | Reaction rate constant k/ min <sup>-1</sup> |         | Activation energy Ea/<br>(kJ mol <sup>-1</sup> ) |
|--------------|---------------------------------------------|---------|--------------------------------------------------|
|              | 308.15K                                     | 318.15K |                                                  |
| COP with CAO | 0.074                                       | 0.086   | 12.249                                           |
| COP with NAO | 0.028                                       | 0.035   | 18.188                                           |
| SOP          | 0.009                                       | 0.021   | 69.062                                           |

**Table S5.** Analysis and comparison of CO, BO and BOO from oily soil

| Items             | CO    | BO    | BOO   |
|-------------------|-------|-------|-------|
| SARA analysis/wt% |       |       |       |
| Saturates         | 43.72 | 50.59 | 47.25 |

|                                                      |        |        |        |
|------------------------------------------------------|--------|--------|--------|
| Aromatics                                            | 30.64  | 38.22  | 46.36  |
| Resins                                               | 13.18  | 8.25   | 4.84   |
| Asphaltenes                                          | 12.46  | 2.94   | 1.55   |
| Elemental content/wt%                                |        |        |        |
| C                                                    | 81.26  | 82.37  | 81.14  |
| H                                                    | 12.48  | 14.87  | 11.58  |
| O                                                    | 2.88   | 0.98   | 4.76   |
| N                                                    | 0.55   | 0.31   | 0.48   |
| S                                                    | 2.83   | 1.47   | 2.04   |
| Density/(g•cm <sup>-3</sup> )(20°C)                  | 0.9435 | 0.9218 | 0.9124 |
| Viscosity/(mm <sup>2</sup> •s <sup>-1</sup> ) (80°C) | 57.82  | 52.17  | 47.25  |
| pH                                                   | 7.62   | 7.58   | 6.34   |
| Calorific value/(kJ•kg <sup>-1</sup> )               | 43,217 | 46,654 | 41,755 |

---

Figure S1. Catalyst preparation process

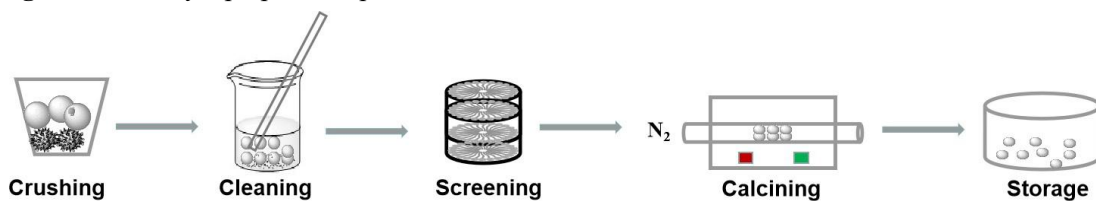

Figure S2. The micromorphology of the oily sludge (a) 50 $\times$  ; (b)200 $\times$

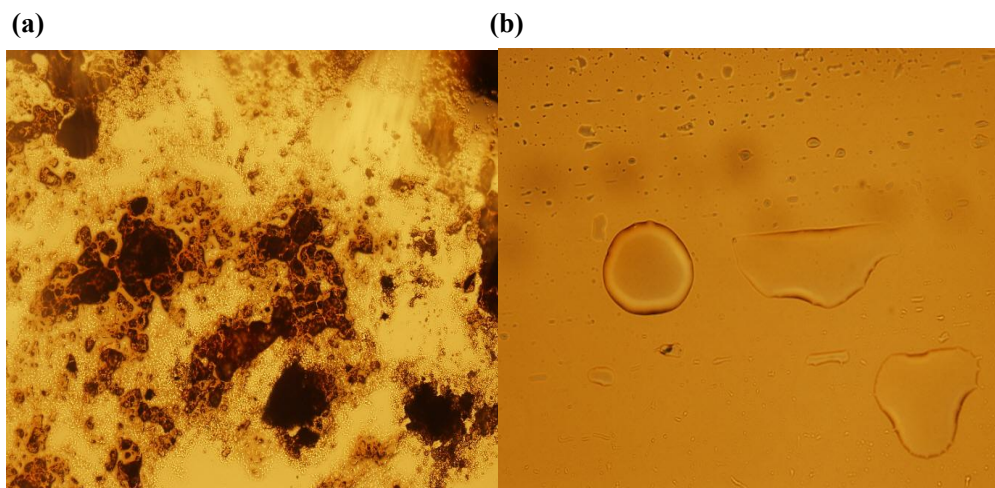

Figure S3. Thermal gravimetric analysis of CO, BO and BOO from oily sludge

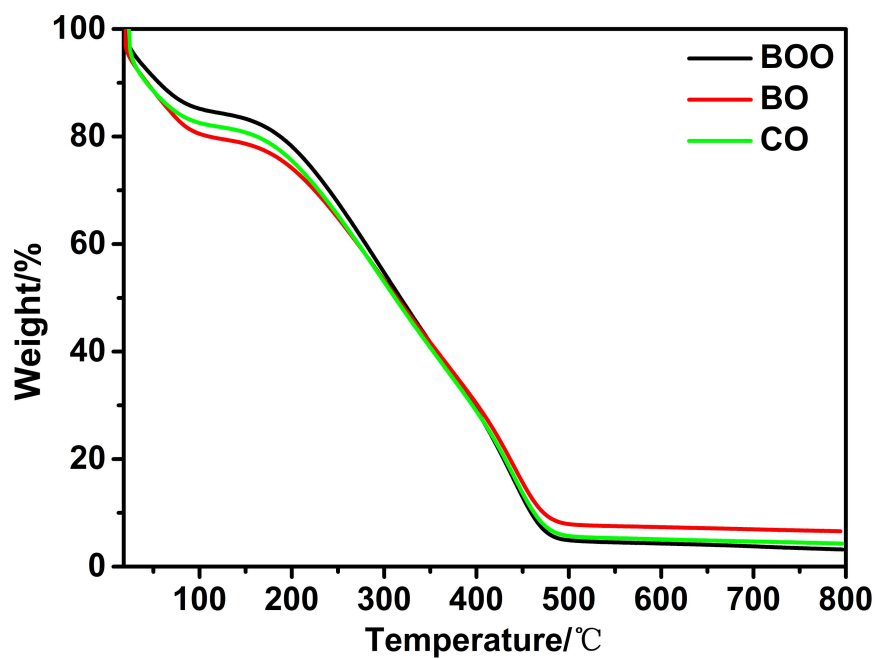

Supplement: ao0c00958_si_001.pdf [file ao0c00958_si_001.pdf]
